# Supplementary material for: A PHABULOSA-Controlled Genetic Pathway Regulates Ground Tissue Patterning in the Arabidopsis Root
Source: PubMed Central journal article supplement (PMC7846283; doi:10.1016/j.cub.2020.10.038), 2021-01-25
Supplement: mmc1.pdf [file mmc1.pdf]

Current Biology, Volume 31

## Supplemental Information

### **A PHABULOSA-Controlled Genetic Pathway Regulates Ground Tissue Patterning in the *Arabidopsis* Root**

**Gaia Bertolotti, Simon Josef Unterholzner, Daria Scintu, Elena Salvi, Noemi Svolacchia, Riccardo Di Mambro, Veronica Ruta, Francisco Linhares Scaglia, Paola Vittorioso, Sabrina Sabatini, Paolo Costantino, and Raffaele Dello Ioio**

**SUPPLEMENTAL DATA:**

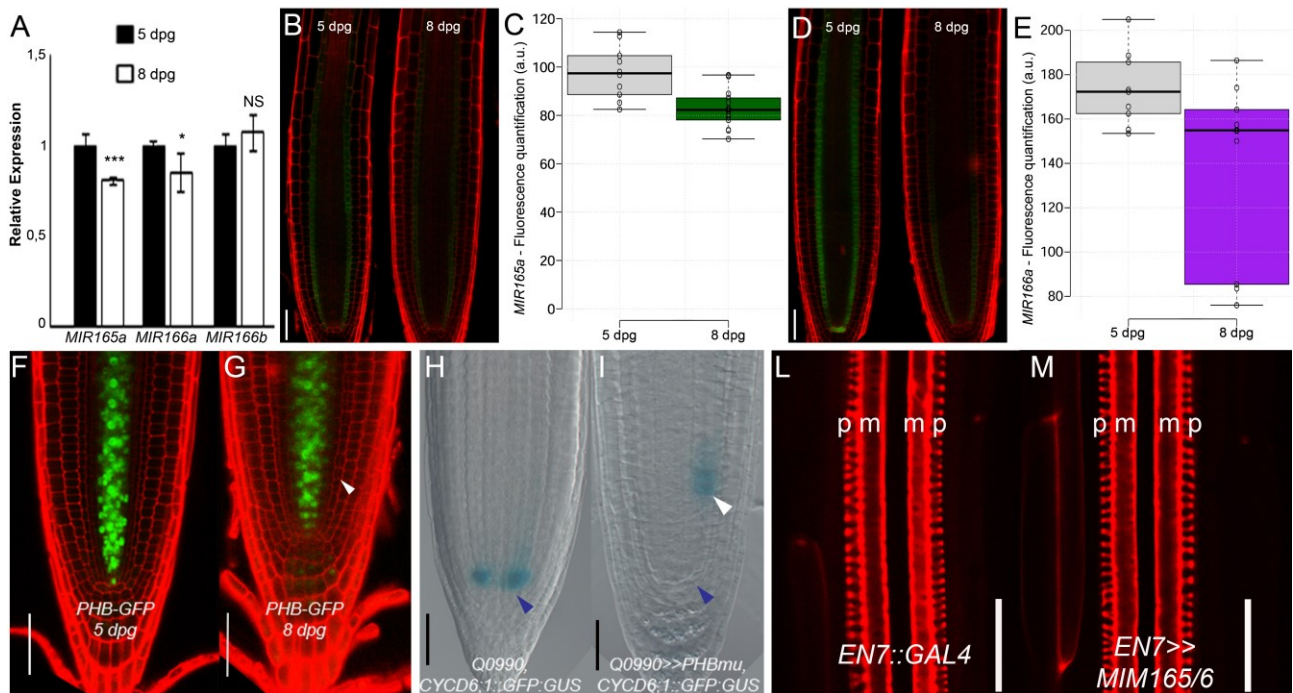

**SD1: PHB directs *CYCD6;1* expression switch cell non autonomously. Related to Figure 1.**

A) Relative expression of *pre-miR165a*, *pre-miR166a* and *pre-miR166b* in 5 and 8 dpg Wt plants. N=3, Student t test (\* $p < 0,05$ ,  $p^{**} < 0,01$ ,  $p^{***} < 0,005$ , NS Not Significant). Error Bars: SD. B) Confocal images of *MIR165A::GFP* roots at 5 dpg and 8 dpg. Scale Bars: 50  $\mu\text{m}$ . C) Fluorescence quantification of *MIR165A::GFP* line at 5 dpg (grey) and at 8 dpg (green) where center lines show the medians. Box limits indicate the 25th and 75th percentiles as determined by R software. Whiskers extend 1.5 times the interquartile range from the 25th and 75th percentiles; data points are plotted as open circles. p-value < 0.005, Student's t-test, n = 10, 14 sample points. D) Confocal images of *MIR166A::GFP* roots at 5 dpg and 8 dpg. Scale Bars: 50  $\mu\text{m}$ . E) Fluorescence quantification of *MIR166A::GFP* line at 5 dpg (grey) and at 8 dpg (purple) where center lines show the medians. Box limits indicate the 25th and 75th percentiles as determined by R software. Whiskers extend 1.5 times the interquartile range from the 25th and 75th percentiles; data points are plotted as open circles. p-value < 0.05, Student's t-test, n = 9, 10 sample points. F,G) Confocal image of a root meristem of a *PHB-GFP* plant at 5 (F) and 8 dpg (G). H,I) Optical microscope images of a 5 dpg root meristem of *Q0990, CYCD6;1::GFP:GUS* (H) and *Q0990>>PHBmu:GFP, CYCD6;1::GFP:GUS* (I). Scale Bars: 50  $\mu\text{m}$ , white arrowheads indicate MC formative asymmetric division, blue arrowheads CEI. L,M) Confocal images of 5 dpg basic fuchsin-clearsee stained *EN7::GAL4* (L) and *EN7>>MIM165/6* (M) roots. p: protoxylem, m:metaxylem. Scale Bars: 20  $\mu\text{m}$ .

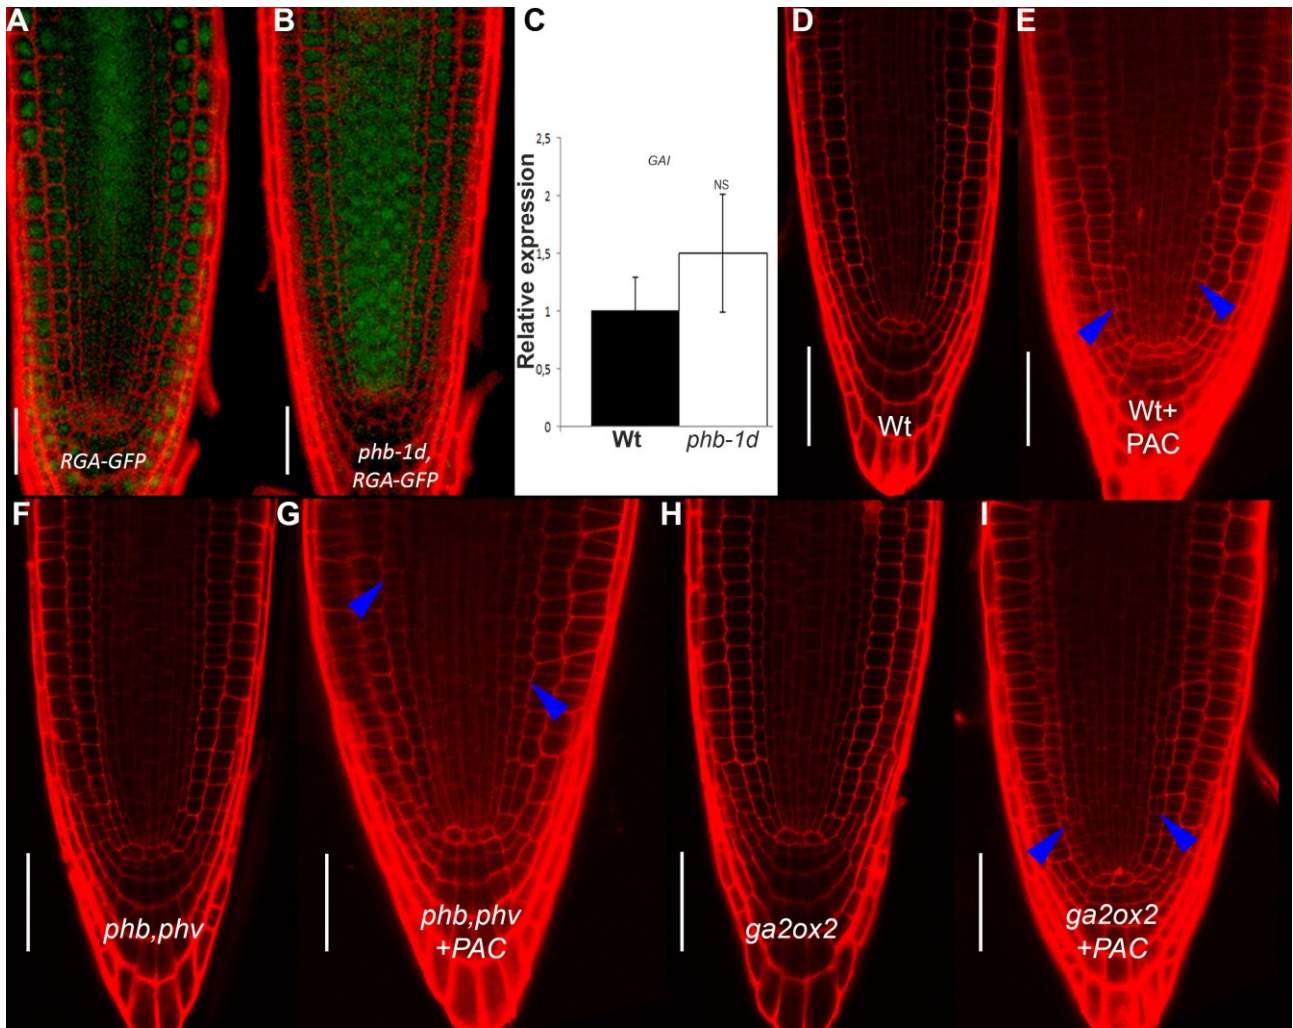

**SD2: PHB regulates MC formation via GAs metabolism regulation. Related to Figure 2.**

A-B) Confocal images of 5 dpv root meristems of *RGA-GFP* (A) and *phb-1d, RGA-GFP* (B). C) qRT-PCR of *GAI* in Wt and *phb-1d* mutants. N=3, Student t test (NS Not Significant). Error Bars: SD. D-I) Confocal images of 5 dpv root meristems of Wt (D), Wt+ PAC (50  $\mu$ M 48h) (E), *phb, phv* (F), *phb, phv*+ PAC (50  $\mu$ M 48h) (G), *ga2ox2* (H), *ga2ox2*+ PAC (50  $\mu$ M 48h)(I). Scale Bars: 50  $\mu$ m, blue arrowheads indicate the additional asymmetric division induced by PAC.

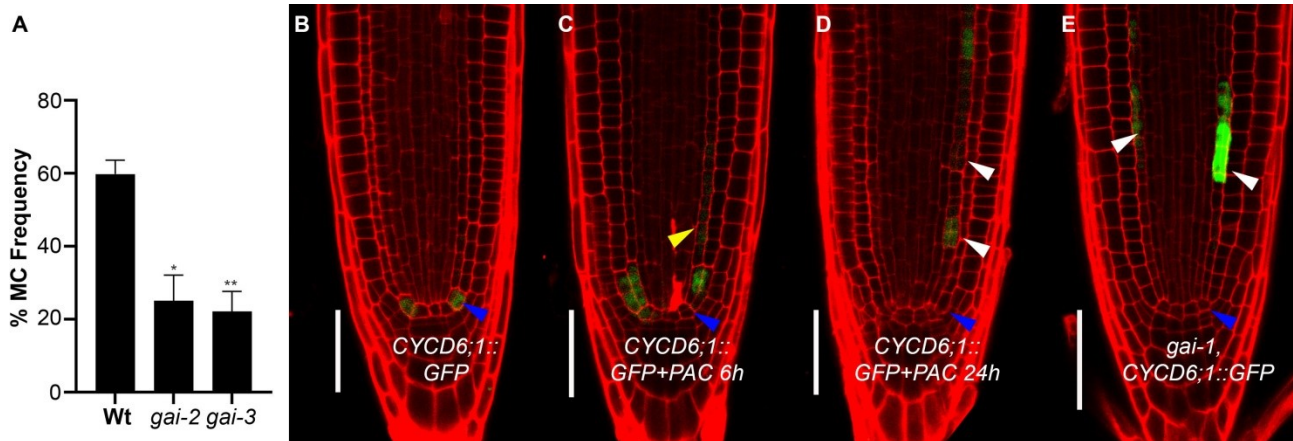

**SD3: GAI directs *CYCD6;1* expression switch. Related to Figure 3**

A) Histogram depicting the percentage of plants showing MC in Wt and *gai-2* and *gai-3* at 8 dpv N=3, Student t test (\* $p < 0,05$ ,  $p^{**} < 0,01$ ). Error Bars: SD. ANOVA  $p < 0,01$ . B-E) Confocal images 5 dpv the root meristem of *CYCD6;1::GFP:GUS* untreated Wt (B), treated (C-D) with PAC (50  $\mu$ M) for 6 (C) and 24 (D) hours and *gai-1* mutant (E). Scale Bars: 50  $\mu$ m, white arrowheads indicate MC formative asymmetric division, blue arrowheads CEI, yellow arrowhead shows the cells accumulating GFP signal prior to cell division.

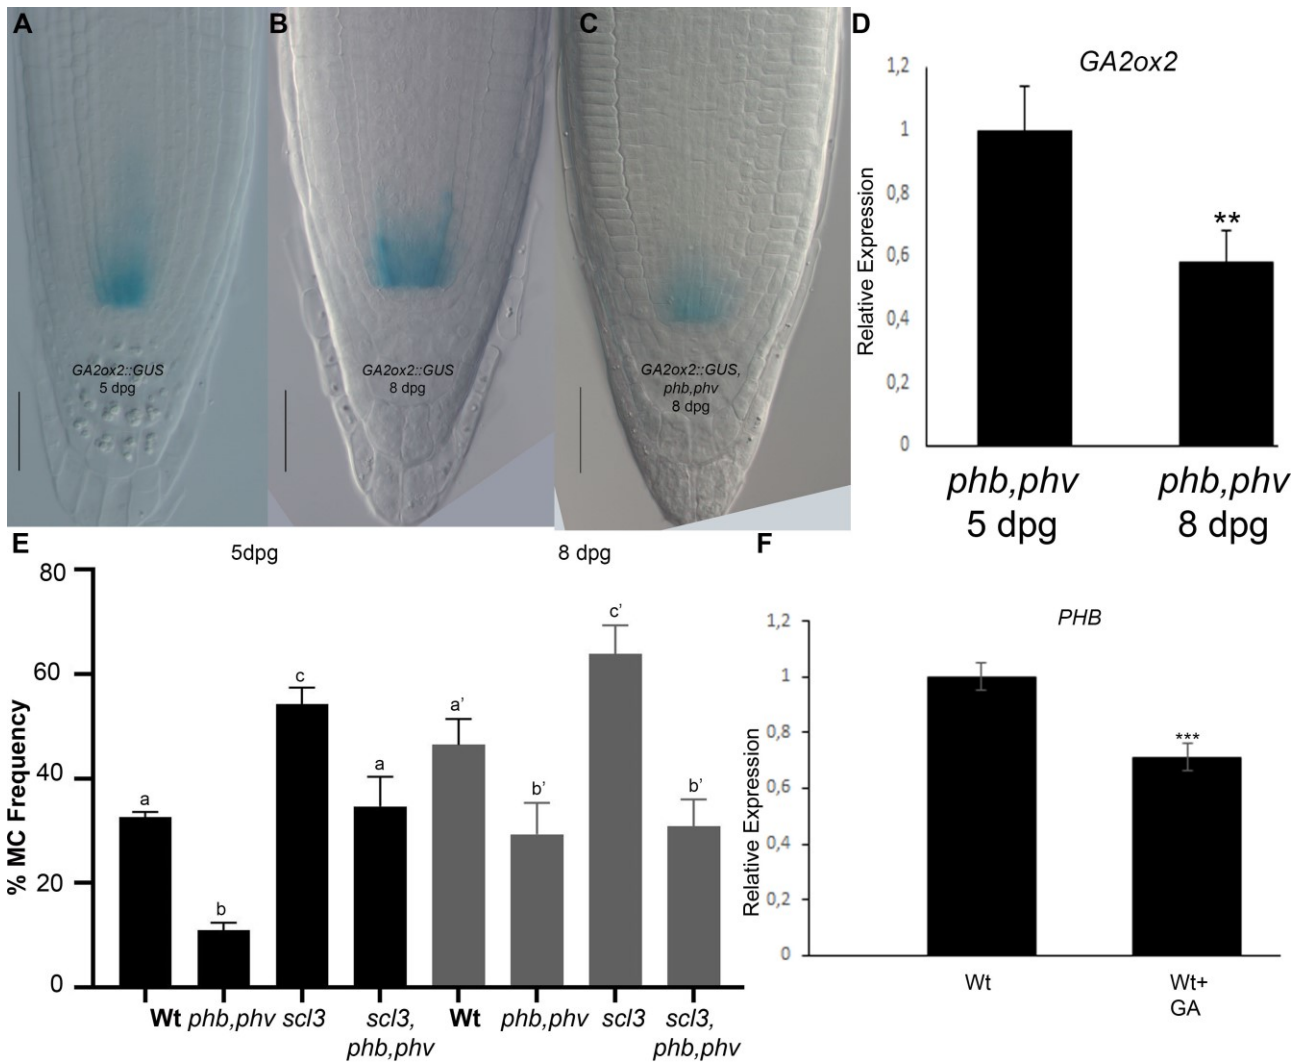

**SD4: PHB and PHV dependent GAs catabolism in the vasculature control MC formation via SCL3. Related to Figure 4.**

A-C) Root meristems of *GA2ox2::GUS* plants at 5 (A) and 8 (B) dpg and 8 dpg *GA2ox2::GUS,phb,phv* plants (C). Scale Bars: 50  $\mu$ m. D) qRT-PCR of *GA2ox2* in *phb,phv* mutants at 5 and 8 dpg. N=3, Student t test ( $p^{**}<0,01$ ). Error Bars: SD. E) Histogram depicting the percentage of plants showing MC in Wt and *phb,phv* and *scl3* and *scl3,phb,phv* at 5 and 8 dpg. N=3, Student t. Error Bars: SD.  $P<0,05$  ANOVA. Letters indicate statistical significance. F) qRT-PCR of *PHB* in Wt plants untreated and treated with GA3 for 6 hours at 8 dpg. N=3, Student t test ( $p^{***}<0,05$ ). Error Bars: SD.

## Genotyping primers

| Background      | Forward                      | Reverse                      | Insertion                              |
|-----------------|------------------------------|------------------------------|----------------------------------------|
| <i>phb-13</i>   | ACCGTACCCTGGATTTAG<br>CC     | TTATCTAGATCCGGTGGATCC<br>AAG | TCAAACGAACGACCAATTC<br>ACG             |
| <i>phv-11</i>   | CCCAATGGTCCACTTTCTT<br>CA    | GCCAGCAAATTTAGCAGAGGA        | GCGTGGACCGCTTGCTGC<br>AACT             |
| <i>gai-t6</i>   | CTAGATCCGACATTGAAG<br>GA     | AGCATCAAGATCAGCTAAAG         | TCGGTACGGGATTTTCGCA<br>T               |
| <i>gai-1</i>    | CTAGATCCGACATTGAAG<br>GA     | AGCATCAAGATCAGCTAAAG         | AGCATCAAGATCAGCTAAA<br>G               |
| <i>cycd6-1</i>  | AATTCGACGACCCATCTCT<br>G     | CTGCAATCACCGATGGTTTA         | ATATTGACCATCATACTCA<br>TTGC            |
| <i>gai-2</i>    | TGTACCACTAGTTGCATG<br>ACAATC | AGCTTCGGCGAAGTAAGTAGC        | GCCTTTTCAGAAATGGATA<br>AATAGCCTTGCTTCC |
| <i>gai-3</i>    | TCGATAAGGTTCTTGGTG<br>TGG    | CAAAGGGTCACGAGTGAAGTC        | GCGTGGACCGCTTGCTGC<br>AACT             |
| <i>ga2ox2-1</i> | GAAAACCCGAATCGTAAA<br>AGC    | GAGACGAGAAGAAATCGCAT<br>G    | GCGTGGACCGCTTGCTGC<br>AACT             |
| <i>scl3-1</i>   | AGCGCAGTTCTTTCTCATG<br>AG    | TTCTCTGTTCTTTAACCCCC         | GCGTGGACCGCTTGCTGC<br>AACT             |

**Table S1: Genotyping primers used in this study. Related to STAR Methods**

## qRT-PCR primers

| Gene           | Forward                    | Reverse                       |
|----------------|----------------------------|-------------------------------|
| <i>GADPH</i>   | TTGGTGACAACAGGTCAAGCA      | AACTTGTCGCTCAATGCA            |
| <i>OTC</i>     | TGAAGGGACAAAGTTGTGTATGTT   | CGCAGACAAAGTGAAT GGA          |
| <i>PHB</i>     | GCTAACAACCCAGCAGGACTCCT    | TAAGCTCGATCGTCCCACCGTT        |
| <i>GA2ox2</i>  | TCCGACCCGAATCATGACT        | CGGCCCGTTTTTAAAGAGAC          |
| <i>GAI</i>     | CTAGATCCGACATTGAAGGA       | AGCATCAAGATCAGCTAAAG          |
| <i>PHV</i>     | GCTAATCTTCTCTCGATTGCGGAGGA | GCTCGATAGTACCACATTTCCAGTG     |
| <i>MIR165A</i> | GATCGATTATCATGAGGGTTAAGC   | CTATAATATCCTCGATCCAGACAAC     |
| <i>MIR166A</i> | GGGGCTTTCTTTTTGAGG         | CGAAAGAGATCCAACATGAATAG       |
| <i>MIR166B</i> | GATTTTTCTTTGAGGGGACTGTTG   | CTGAATGTATTCAAATGAGATTGTATTAG |

**Table S2: qRT-PCR primers used in this study. Related to STAR Methods**

### ChIP-qPCR primers

| Region | Forward               | Reverse                  |
|--------|-----------------------|--------------------------|
| A      | CTGATCCATAGGCATCATGTA | TGCTTTCTGGTTGTAGGTTCTC   |
| B      | AGATCCAATCATTTCCTCCAT | GTTTGGATAATTGGAAGAATTTTA |
| C      | GACGGGCATTGGTGATTTATT | ATAGAAACATCCTTATCCTCAC   |

**Table S3. ChIP-qPCR primers used in this study. Related to STAR Methods.**
